# Supplementary material for: Phase 1 pilot study of e-mail support for people with long term conditions using the Internet
Source: Springer Nature journal article supplement (doi:10.1186/1472-6947-11-20), 2011-04-05

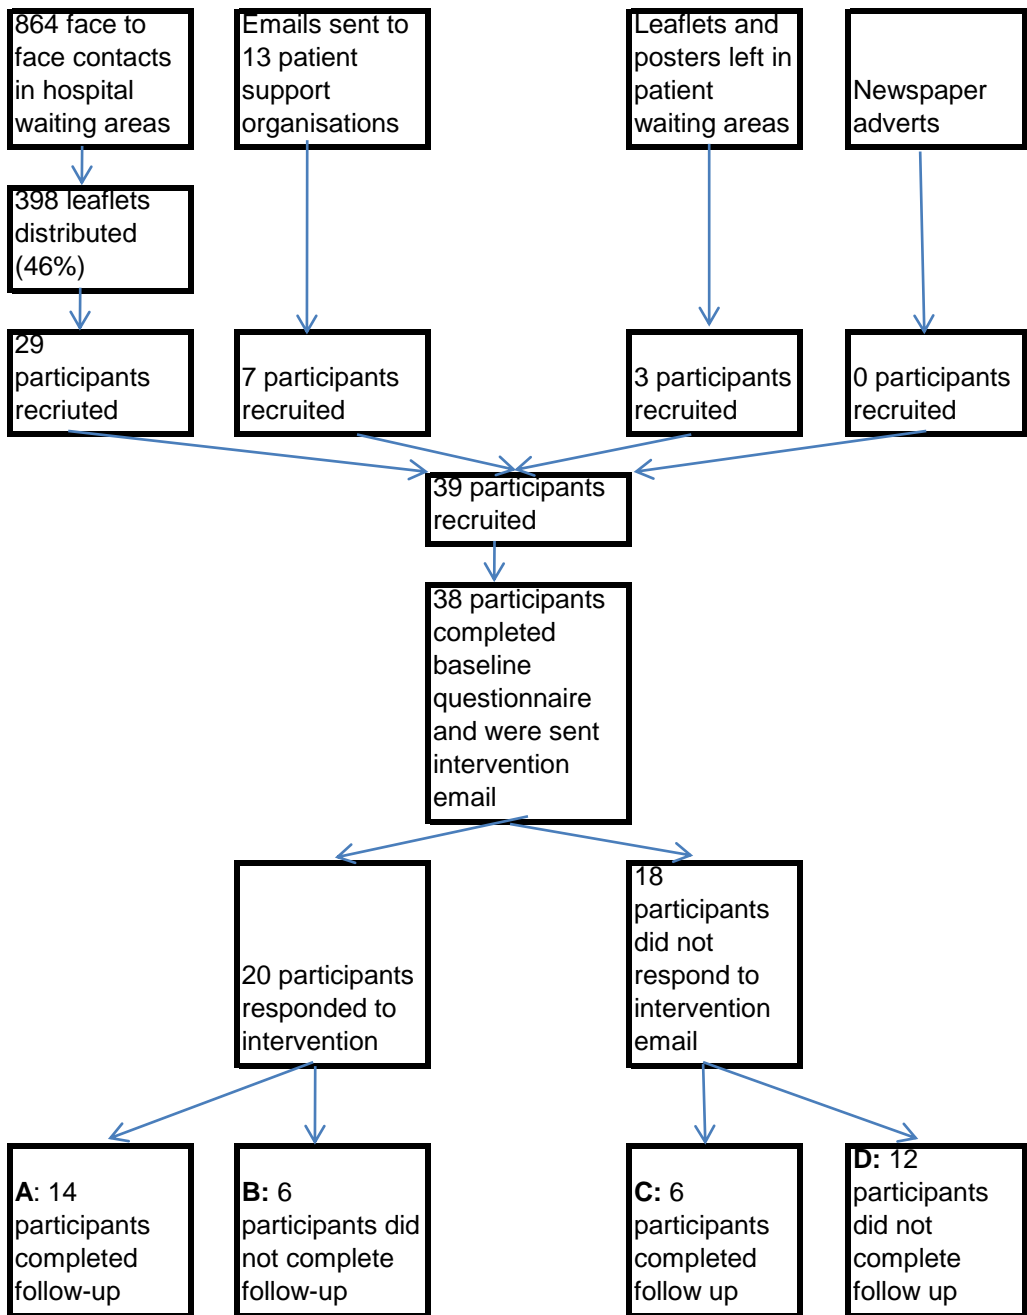

Supplement: 12911_2010_397_MOESM4_ESM.pdf [file 12911_2010_397_MOESM4_ESM.pdf]
